# Supplementary material
Source: publisher figshare collection journal article supplement (https://acs.figshare.com/ndownloader/files/31468426)
Supplement: Supplementary file 1 [file 31468426]

## **Regulation of the Enzymatic Activities of Lysozyme by the Surface Ligands of Ultrasmall Gold Nanoclusters: The Role of Hydrophobic Interactions**

Ling Cao <sup>a</sup>, Wen-Qi Chen <sup>a</sup>, Lian-Jiao Zhou <sup>a</sup>, Yu-Ying Wang <sup>a</sup>, Yi Liu <sup>a,b</sup> and Feng-Lei Jiang <sup>\*,a</sup>

<sup>a</sup> Sauvage Center for Molecular Sciences, College of Chemistry and Molecular Sciences, Wuhan University, Wuhan 430072, P. R. China

<sup>b</sup> College of Chemistry and Chemical Engineering, Tiangong University, Tianjin 300387, P. R. China

\*Corresponding Author. E-mail: fljiang@whu.edu.cn. Tel: +86-27-68756667.

### **Table of contents**

Details for the syntheses and characterizations of AuNCs

Figure S1. Characterizations of DHLA-AuNCs and GSH-AuNCs

Figure S2. Corresponding histograms of the size distributions of DHLA-AuNCs and GSH-AuNCs

Figure S3. Fluorescence quenching spectra of Lys titrated by DHLA-AuNCs and GSH-AuNCs under different temperatures

Figure S4. Fluorescence spectra of DHLA-AuNCs and GSH-AuNCs titrated by Lys

Table S1. Fluorescence lifetime of Lys incubated with DHLA-AuNCs

Table S2. Fluorescence lifetime of Lys incubated with GSH-AuNCs

Figure S5. 3D fluorescence spectra of Lys in the absence or presence of DHLA-AuNCs and GSH-AuNCs

Figure S6. BCA working curves of Lys

Table S3. The concentration of DHLA-AuNCs when centrifugalizing at different speed

Table S4. The concentration of Lys incubated with DHLA-AuNCs quantified by BCA

Table S5. The concentration of Lys incubated with GSH-AuNCs quantified by BCA

Figure S7. Activity of Lys incubated with DHLA-AuNCs and GSH-AuNCs

Figure S8. Activity of Lys incubated with DHLA-AuNCs for different times

Figure S9. Effects of ligands (LA and GSH) on Lys activity

Figure S10. Activity of Lys incubated with DHLA-AuNCs and GSH-AuNCs determined by the filter paper disk agar diffusion method

Figure S11. Activity of Lys incubated with different concentration of NaCl

Figure S12. Synchronous fluorescence of Lys in the absence and presence of GSH-AuNCs

Table S6. Content of secondary structures of Lys when incubated with DHLA-AuNCs

Figure S13. CD spectra of Lys incubated with DHLA-AuNCs in the absence and presence of NaCl

Figure S14. Surface potential diagram of Lys

References

## Syntheses of AuNCs

The synthesis procedure of DHLA-AuNCs was according to the literature method with minor modifications<sup>1</sup>. 78 mg LA was added to 200 mL aqueous solution containing 700  $\mu$ L NaOH (2 M). The mixture was stirred for 20 min to completely dissolve the LA, followed by the addition of HAuCl<sub>4</sub> solution (4.8 mL, 1% by mass). The solution turned from light yellow to colorless upon stirring for another 5 min. Subsequently, an aqueous solution of NaBH<sub>4</sub> (4.8 mL, 50 mM) was added dropwise to the mixture under rapid stirring. The mixture was stirred overnight. The DHLA-AuNCs were concentrated using a 10 kDa ultrafiltration tube and dialyzed with a 3500 Da dialysis bag for 24 h in phosphate buffered saline (PBS) (0.01 M, pH 7.4) buffer. The buffer solution was renewed every 4 h.

The synthesis procedure of GSH-AuNCs was according to the literature method with minor modifications<sup>2</sup>. The freshly prepared aqueous solutions of HAuCl<sub>4</sub> (20 mM, 0.50 mL) and GSH (100 mM, 0.15 mL) were mixed with 4.35 mL of ultrapure water at 25 °C. The reaction mixture was heated to 75 °C under gentle stirring (500 rpm) for 12 h. An aqueous solution of strongly orange-emitting Au NCs was formed. The orange-emitting Au NCs were precipitated with 3-fold amount of 2-propanol, and then resuspended in ultrapure water and precipitated with 2-propanol three times. The purified Au NCs were dried overnight at 37 °C in vacuum, and the final product in the powder form could be dispersed in phosphate buffered saline (PBS) and further purified by dialysis against 0.01 mol·L<sup>-1</sup> PBS buffer for 24 h, and the buffer solution was renewed every 4 h.

## Characterizations of AuNCs

The concentration of Au in DHLA-AuNCs or GSH-AuNCs was determined by inductively coupled plasma atomic emission spectrometry (ICP-AES). Then, according to the literature<sup>1-3</sup>, Au<sub>22</sub> may be the predominant species in the DHLA-AuNCs we synthesized, and Au<sub>36</sub> was used as the average particle composition of GSH-AuNCs. Combined with these conditions, the concentrations of gold nanoclusters were measured.

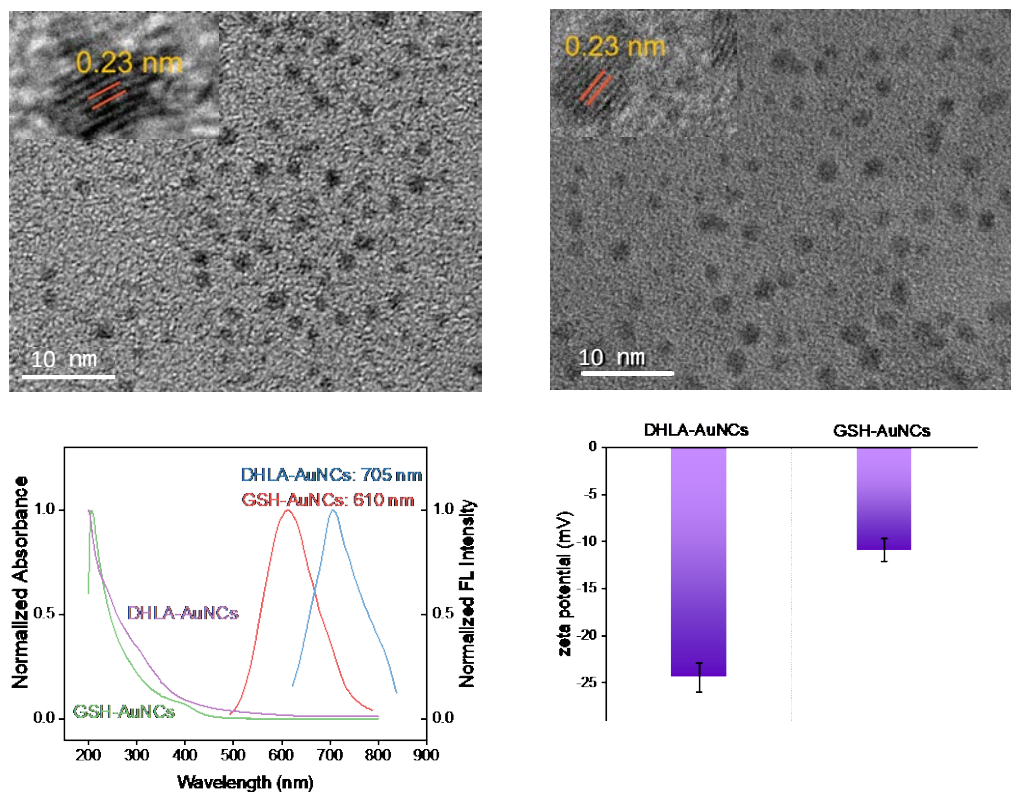

**Figure S1.** The TEM images of DHLA-AuNCs (a) and GSH-AuNCs (b). Scale bars in the insets of (a) and (b) were 5 nm and 10 nm, respectively. (c) The UV-vis absorption and emission spectra of DHLA-AuNCs and GSH-AuNCs, respectively. (d) The zeta potential of DHLA-AuNCs and GSH-AuNCs.

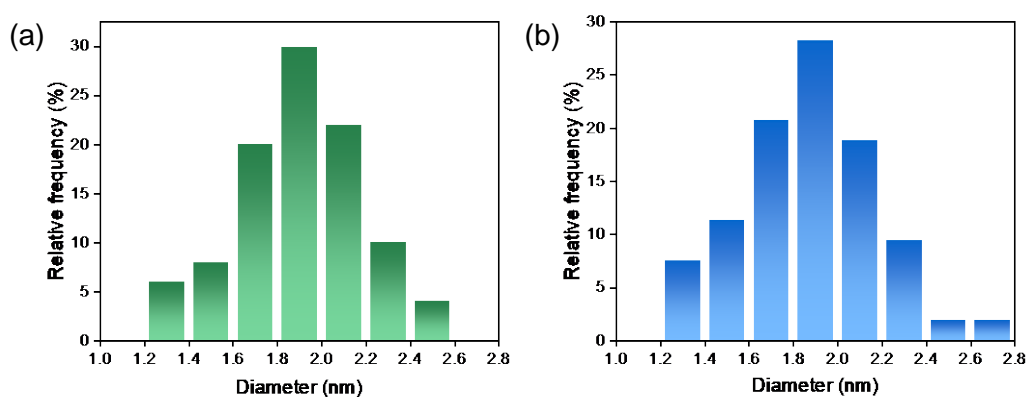

**Figure S2.** The corresponding size statistical results from TEM of DHLA-AuNCs (a) and GSH-AuNCs (b), respectively.

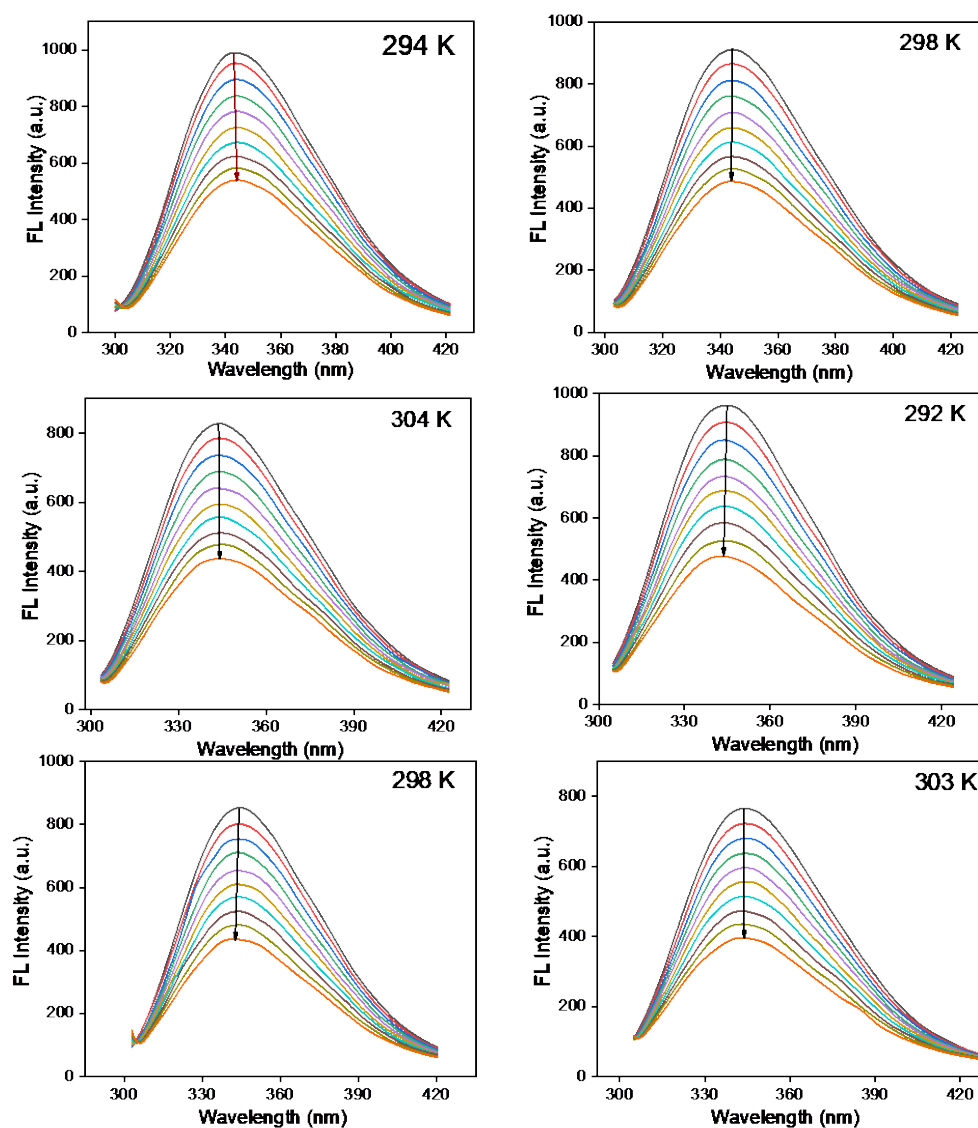

**Figure S3.** The fluorescence quenching spectra of Lys titrated by DHLA-AuNCs at 294K (a), 298 K (b), 304 K (c). Fluorescence quenching spectra of Lys titrated by GSH-AuNCs at 292 K (d), 298 K (e), 303 K (f).

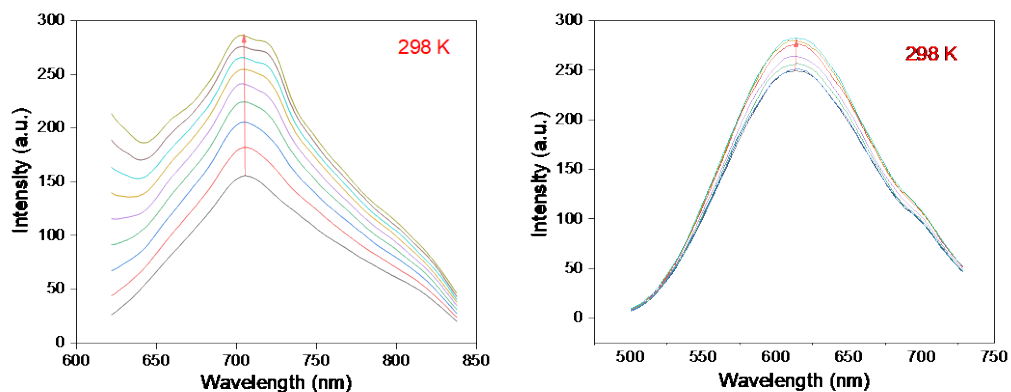

**Figure S4.** The fluorescence spectra of DHLA-AuNCs (a) and GSH-AuNCs (b) titrated by Lys at 298 K.

**Table S1.** The fluorescence lifetime of Lys incubated with DHLA-AuNCs at different molar ratios.

| AuNCs: Lys | $\tau_1$ (ns) | $\alpha_1$ | $\tau_2$ (ns) | $\alpha_2$ | $\tau_{av}(ns)$ | $\chi^2$ |
|------------|---------------|------------|---------------|------------|-----------------|----------|
| 0:1        | 1.67          | 60%        | 3.33          | 40%        | 2.33            | 1.069    |
| 0.5:1      | 1.77          | 73%        | 3.97          | 27%        | 2.36            | 1.291    |
| 1:1        | 1.51          | 60%        | 3.55          | 40%        | 2.33            | 1.202    |
| 2:1        | 0.73          | 57%        | 3.62          | 43%        | 1.97            | 1.250    |

**Table S2.** The fluorescence lifetime of Lys incubated with GSH-AuNCs at different molar ratios.

| AuNCs: Lys | $\tau_1$ (ns) | $\alpha_1$ | $\tau_2$ (ns) | $\alpha_2$ | $\tau_{av}(ns)$ | $\chi^2$ |
|------------|---------------|------------|---------------|------------|-----------------|----------|
| 0:1        | 2.04          | 65%        | 4.48          | 35%        | 2.89            | 1.055    |
| 0.5:1      | 2.06          | 69%        | 4.49          | 31%        | 2.81            | 0.963    |
| 1:1        | 2.14          | 75%        | 4.79          | 25%        | 2.80            | 1.031    |
| 2:1        | 2.12          | 73%        | 4.55          | 27%        | 2.78            | 1.040    |

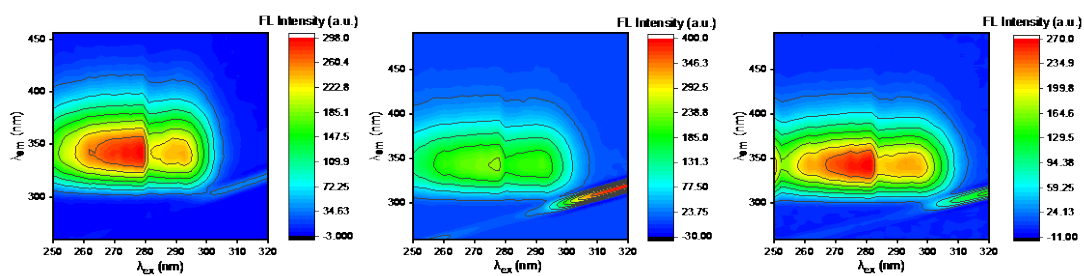

**Figure S5.** 3D fluorescence spectra of Lys (a) and Lys incubated with DHLA-AuNCs (b) and GSH-AuNCs (c), respectively.

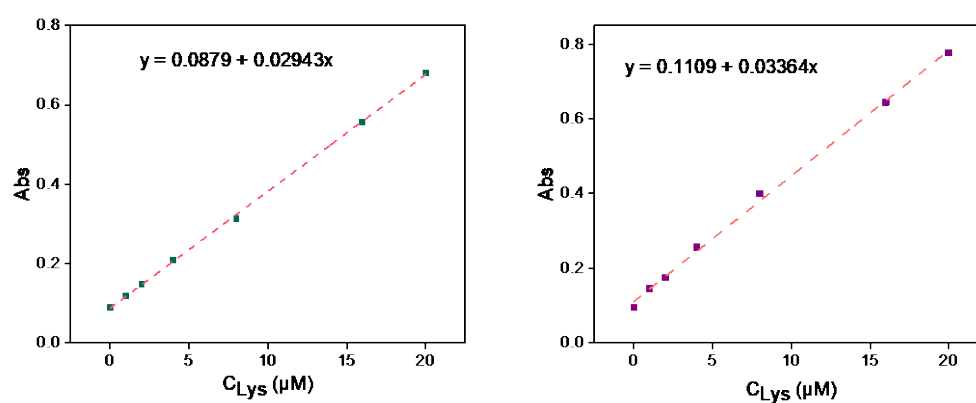

**Figure S6.** The BCA working curves of Lys for DHLA-AuNCs-Lys complex (a) and GSH-AuNCs-Lys complex (b), respectively.

**Table S3.** The concentration of DHLA-AuNCs solution when centrifugalizing at different speed.

| Speed (rpm) | $c_{\text{AuNCs}}$ ( $\mu\text{M}$ ) |
|-------------|--------------------------------------|
| 0           | 3.33                                 |
| 3000        | 3.29                                 |
| 6500        | 3.09                                 |
| 12000       | 3.22                                 |

**Table S4.** The concentration of Lys in the supernatant ( $c_{\text{ex}}$ ) and the amount that bound with DHLA-AuNCs ( $c_{\text{bound}}$ ) quantified by BCA. The  $c_{\text{ex}}$  at 0:1 was set as zero to better show the results.

| Lys : DHLA-<br>AuNCs | $c_0$ ( $\mu\text{M}$ ) | Abs   | $c_{\text{ex}}$ ( $\mu\text{M}$ ) | $c_{\text{bound}}$ ( $\mu\text{M}$ ) |
|----------------------|-------------------------|-------|-----------------------------------|--------------------------------------|
| 0:1                  | 0.000                   | 0.088 | 0.000                             | 0.000                                |
| 0.25:1               | 0.625                   | 0.090 | 0.047                             | 0.578                                |
| 0.5:1                | 1.250                   | 0.089 | 0.014                             | 1.236                                |
| 0.75:1               | 1.875                   | 0.089 | 0.022                             | 1.853                                |
| 1:1                  | 2.500                   | 0.092 | 0.141                             | 2.359                                |
| 2:1                  | 5.000                   | 0.166 | 2.649                             | 2.351                                |
| 4:1                  | 10.000                  | 0.310 | 7.533                             | 2.467                                |

**Table S5.** The concentration of Lys in the supernatant ( $c_{\text{ex}}$ ) and the amount that bound with GSH-AuNCs ( $c_{\text{bound}}$ ) quantified by BCA. The  $c_{\text{ex}}$  at 0:1 was set as zero to better show the results.

| Lys : GSH-<br>AuNCs | $c_0$ ( $\mu\text{M}$ ) | Abs   | $c_{\text{ex}}$ ( $\mu\text{M}$ ) | $c_{\text{bound}}$ ( $\mu\text{M}$ ) |
|---------------------|-------------------------|-------|-----------------------------------|--------------------------------------|
| 0:1                 | 0.000                   | 0.110 | 0.000                             | 0.000                                |
| 0.25:1              | 0.625                   | 0.119 | 0.263                             | 0.362                                |
| 0.75:1              | 1.875                   | 0.126 | 0.4671                            | 1.408                                |
| 1:1                 | 2.500                   | 0.127 | 0.500                             | 2.000                                |
| 2:1                 | 5.000                   | 0.131 | 0.619                             | 4.381                                |
| 4:1                 | 10.000                  | 0.169 | 1.733                             | 8.267                                |
| 6:1                 | 15.000                  | 0.331 | 6.584                             | 8.416                                |



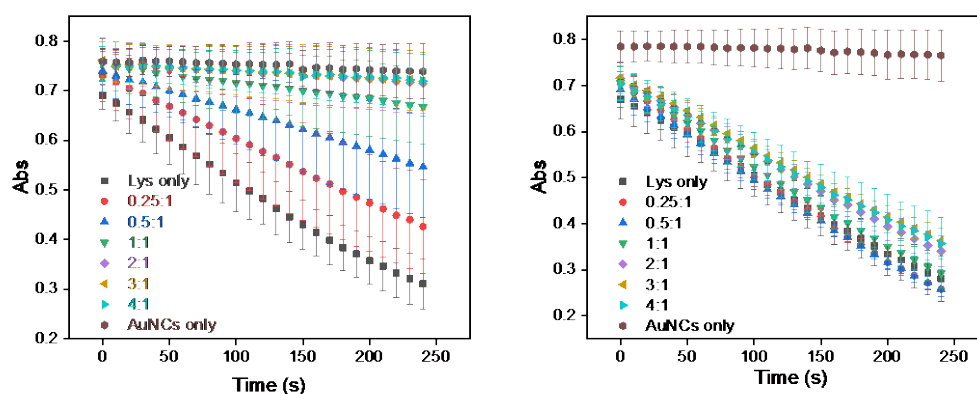

**Figure S7.** The absorbance changes of *Micrococcus luteus* induced by Lys incubated with different molar ratio of DHLA- AuNCs (a) and GSH-AuNCs (b), respectively.

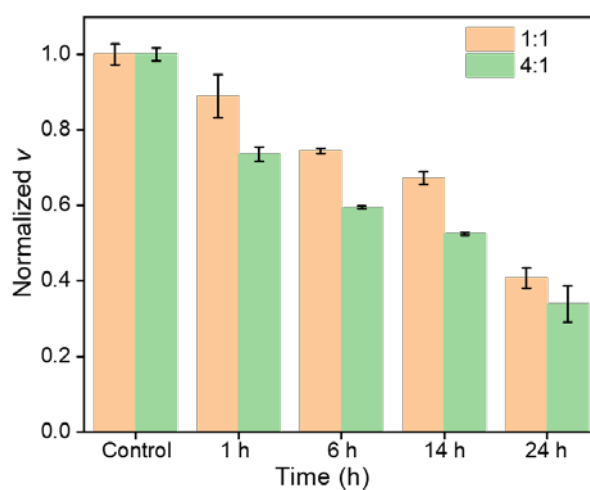

**Figure S8.** The normalized  $\nu$  of lysozyme when incubated with DHLA-AuNCs (molar ratio of DHLA-AuNCs : Lys = 1: 1 or 4:1) for different times.

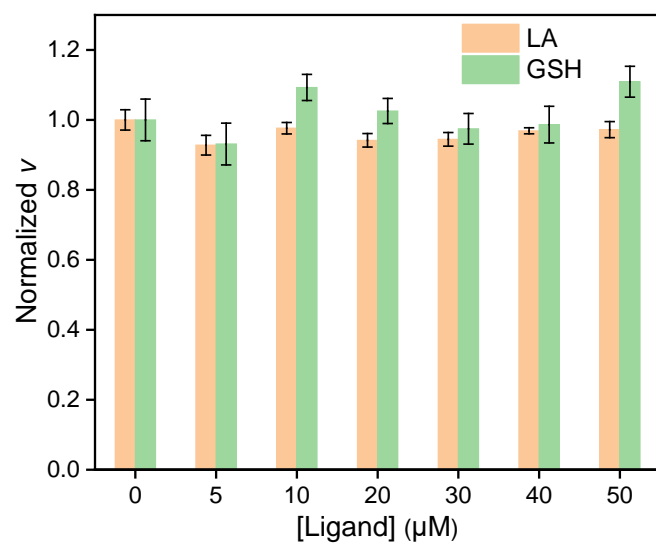

**Figure S9.** Normalized  $v$  of Lys-catalyzed reactions under different concentrations of LA and GSH.

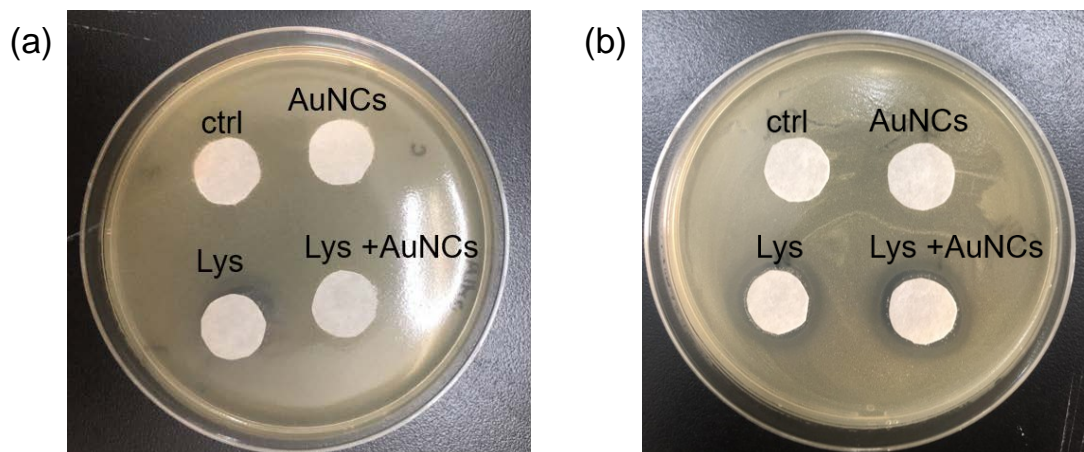

**Figure S10.** Anti-bacterial activity of Lys in the presence of DHLA-AuNCs (a) and Lys-GSH-AuNCs (b) against *Micrococcus luteus* determined by the filter paper disk agar diffusion method.

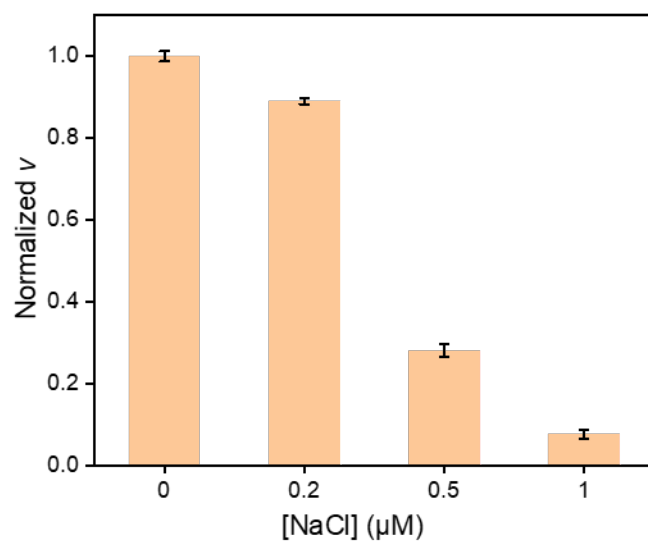

**Figure S11.** The normalized  $\nu$  of Lys when incubating with different concentration of NaCl.

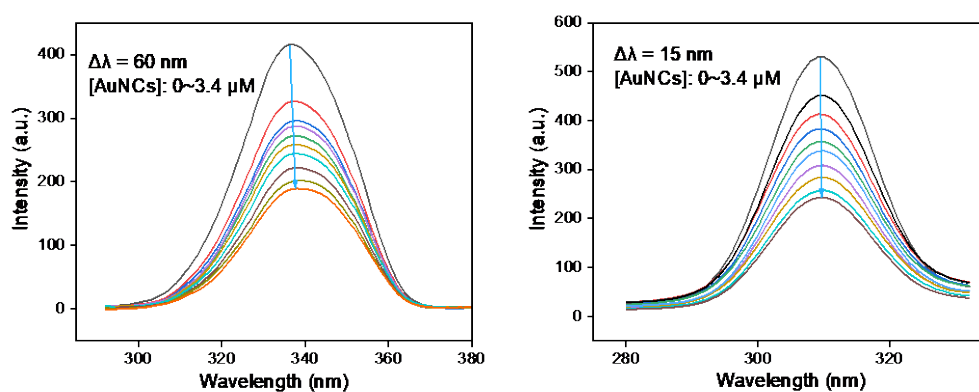

**Figure S12.** Synchronous fluorescence of Lys in the absence and presence of GSH-AuNCs. (a)  $\Delta\lambda = 60$  nm. (b)  $\Delta\lambda = 15$  nm.

**Table S6.** The contents of secondary structures of lysozyme when incubated with DHLA-AuNCs.  $c(\text{Lys}) = 10 \mu\text{M}$ .

| $c(\text{DHLA-AuNCs})$<br>( $\mu\text{M}$ ) | $\alpha$ -helix<br>( $\pm 3\%$ ) | $\beta$ -sheet<br>( $\pm 2\%$ ) | Turns<br>( $\pm 1\%$ ) | Unordered<br>( $\pm 1\%$ ) | Total  |
|---------------------------------------------|----------------------------------|---------------------------------|------------------------|----------------------------|--------|
| 0                                           | 29.7%                            | 19.3%                           | 23.8%                  | 27.2%                      | 100.0% |
| 1                                           | 27.4%                            | 21.0%                           | 22.6%                  | 29.5%                      | 100.5% |
| 2                                           | 25.2%                            | 21.6%                           | 22.7%                  | 28.6%                      | 98.1%  |
| 5                                           | 18.2%                            | 29.0%                           | 23.5%                  | 26.1%                      | 96.8%  |
| 10                                          | 12.0%                            | 53.2%                           | 17.2%                  | 18.2%                      | 100.6% |

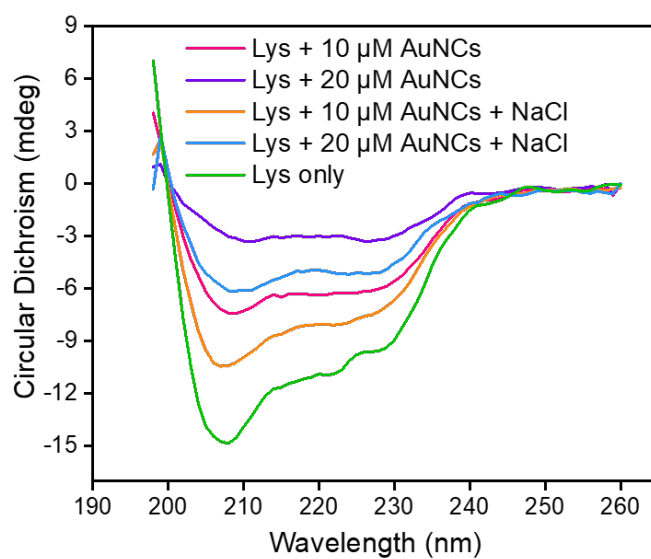

**Figure S13.** CD spectra of Lys incubated with DHLA-AuNCs at different molar ratios in the absence and presence of NaCl.  $[\text{NaCl}] = 0.2 \text{ M}$ .

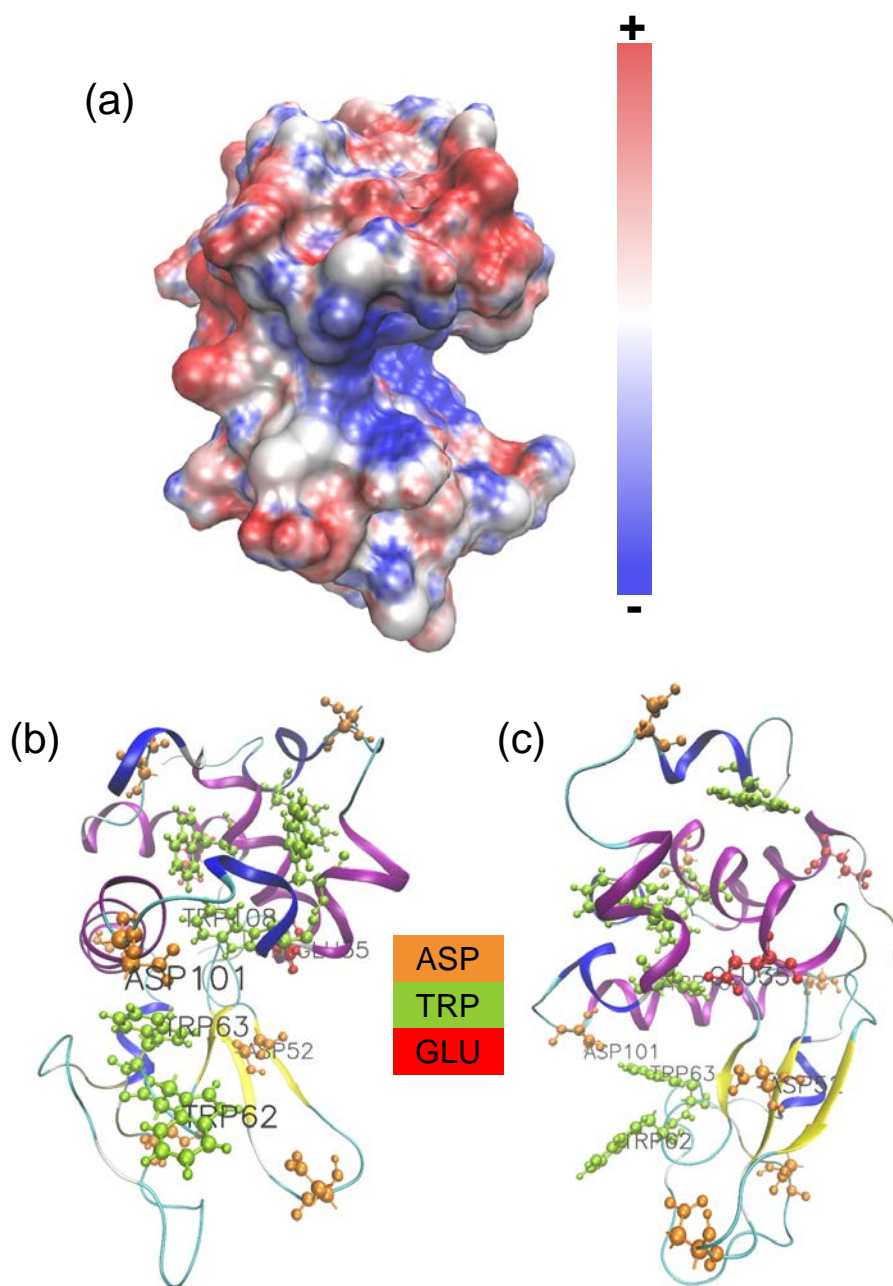

**Figure S14.** Surface potential diagram of Lys (a). Schematic representations of Lys at front side (b) and lateral side (c). These images were made with VMD (Visual Molecular Dynamics).

## REFERENCES

1. Shang, L.; Azadfar, N.; Stockmar, F.; Send, W.; Trouillet, V.; Bruns, M.; Gerthsen, D.; Nienhaus, G. U. One-pot synthesis of near-infrared fluorescent gold clusters for cellular fluorescence lifetime imaging. *Small* **2011**, *7*, 2614-2620.
2. Luo, Z.; Yuan, X.; Yu, Y.; Zhang, Q.; Leong, D. T.; Lee, J. Y.; Xie, J. From Aggregation-Induced Emission of Au(I)–Thiolate Complexes to Ultrabright Au(0)@Au(I)–Thiolate Core–Shell Nanoclusters. *J. Am. Chem. Soc.* **2012**, *134*, 16662-16670.
3. Yin, M. M.; Dong, P.; Chen, W. Q.; Xu, S. P.; Yang, L. Y.; Jiang, F. L.; Liu, Y. Thermodynamics and Mechanisms of the Interactions between Ultrasmall Fluorescent Gold Nanoclusters and Human Serum Albumin, gamma-Globulins, and Transferrin: A Spectroscopic Approach. *Langmuir* **2017**, *33*, 5108-5116.
